# Supplementary material for: Level of Satisfaction of Post-Doctoral Graduates with the Instruction of Clinical Skills: A Cross-Sectional Self-Assessment Study in 2019 and 2020
Source: Research Square preprint supplement (doi:10.21203/rs.3.rs-6264122/v1), 2025-05-05
Supplement: Supplementary file 1 [file 3bfc7e2e18285efe5fada4ec.pdf]

Assessing the extent to which the goals of teaching practical courses in the curriculum of post-graduate dental fields have been achieved from the perspective of participants in the National Board exam

Field of study: Periodontics

University of Education:..... Dental work experience.....

Dear colleague, this questionnaire is designed to improve clinical skills training in specialized groups of dental schools in the country. We kindly ask you to actively participate in this important matter by answering accurately and choosing one of the options: poor, average, good, excellent, and completing other question options.

A) Overall assessment

| Row | Index                                       | Excellent | Good | Average | Poor |
|-----|---------------------------------------------|-----------|------|---------|------|
| 1   | Quality of basic science courses            |           |      |         |      |
| 2   | Quality of interdisciplinary courses        |           |      |         |      |
| 3   | Quality of the faculty members of the group |           |      |         |      |
| 4   | Number of faculty members in the group      |           |      |         |      |
| 5   | Quality of treated clinical cases           |           |      |         |      |
| 6   | Number of clinical cases treated            |           |      |         |      |
| 7   | Overall course evaluation                   |           |      |         |      |

- What specific skills do you need additional training in after graduation?

.....  
 .....  
 .....

Explanation..... :

b) How do you evaluate the impact of post-doctoral course training on acquiring the following clinical skills?

| Row | Skill                                   | Excellent | Good | Average | Poor |
|-----|-----------------------------------------|-----------|------|---------|------|
| 1   | Student education                       |           |      |         |      |
| 2   | Research Method                         |           |      |         |      |
| 3   | Professional ethics                     |           |      |         |      |
| 4   | Forensic Medicine Laws                  |           |      |         |      |
| 5   | Infection control                       |           |      |         |      |
| 6   | Clinical photography                    |           |      |         |      |
| 7   | Clinical pharmacology                   |           |      |         |      |
| 8   | Medical emergencies                     |           |      |         |      |
| 9   | Evaluating articles                     |           |      |         |      |
| 10  | Thesis                                  |           |      |         |      |
| 11  | Treatment plan for periodontal patients |           |      |         |      |
| 12  | Non-surgical periodontal treatments     |           |      |         |      |
| 13  | Periodontal flap                        |           |      |         |      |
| 14  | Crown lengthening Surgery               |           |      |         |      |
| 15  | Gingivectomy                            |           |      |         |      |
| 16  | GTR                                     |           |      |         |      |
| 17  | Soft tissue grafting                    |           |      |         |      |
| 18  | Root coverage                           |           |      |         |      |
| 19  | Exposure of impacted teeth              |           |      |         |      |
| 20  | Dental lasers                           |           |      |         |      |
| 21  | Treatment plan for implant patients     |           |      |         |      |
| 22  | Overdenture implants                    |           |      |         |      |
| 23  | Posterior implants                      |           |      |         |      |
| 24  | Aesthetic implants                      |           |      |         |      |
| 25  | Immediate implant                       |           |      |         |      |
| 26  | Peri-implantitis                        |           |      |         |      |
| 27  | Horizontal augmentation                 |           |      |         |      |
| 28  | Vertical augmentation                   |           |      |         |      |
| 29  | Closed sinus lift                       |           |      |         |      |
| 30  | Open sinus lift                         |           |      |         |      |
| 31  | Autogenous bone graft                   |           |      |         |      |
| 32  | Patient follow-up                       |           |      |         |      |

Thank you

Assessing the extent to which the goals of teaching practical courses in the curriculum of post-graduate dental fields have been achieved from the perspective of participants in the National Board exam

Field of study: Oral and Maxillofacial Surgery

University of Education:..... Dental work experience.....

Dear colleague, this questionnaire is designed to improve clinical skills training in specialized groups of dental schools in the country. We kindly ask you to actively participate in this important matter by answering accurately and choosing one of the options: poor, average, good, excellent, and completing other question options.

A) Overall assessment

| Row | Index                                       | Excellent | Good | Average | Poor |
|-----|---------------------------------------------|-----------|------|---------|------|
| 1   | Quality of basic science courses            |           |      |         |      |
| 2   | Quality of interdisciplinary courses        |           |      |         |      |
| 3   | Quality of the faculty members of the group |           |      |         |      |
| 4   | Number of faculty members in the group      |           |      |         |      |
| 5   | Quality of treated clinical cases           |           |      |         |      |
| 6   | Number of clinical cases treated            |           |      |         |      |
| 7   | Overall course evaluation                   |           |      |         |      |

- What specific skills do you need additional training in after graduation?

.....

.....

.....

:Explanation.....

b) How do you evaluate the impact of post-doctoral course training on acquiring the following clinical skills?

| Row | Skill                                    | Excellent | Good | Average | Poor |
|-----|------------------------------------------|-----------|------|---------|------|
| 1   | Student education                        |           |      |         |      |
| 2   | Research Method                          |           |      |         |      |
| 3   | Professional ethics                      |           |      |         |      |
| 4   | Forensic Medicine Laws                   |           |      |         |      |
| 5   | Infection control                        |           |      |         |      |
| 6   | Clinical photography                     |           |      |         |      |
| 7   | Clinical pharmacology                    |           |      |         |      |
| 8   | Medical emergencies                      |           |      |         |      |
| 9   | Evaluating articles                      |           |      |         |      |
| 10  | Thesis                                   |           |      |         |      |
| 11  | Treatment plan                           |           |      |         |      |
| 12  | Patient History and physical examination |           |      |         |      |
| 13  | Removal of impacted teeth                |           |      |         |      |
| 14  | Periapical surgery                       |           |      |         |      |
| 15  | Periodontal surgery                      |           |      |         |      |
| 16  | Orthognathic surgery                     |           |      |         |      |
| 17  | Oro-antral fistula                       |           |      |         |      |
| 18  | pre-prosthetic Surgery                   |           |      |         |      |
| 19  | Infections                               |           |      |         |      |
| 20  | Osteomyelitis/osteonecrosis              |           |      |         |      |
| 21  | Incision & drainage of abscess/hematoma  |           |      |         |      |
| 22  | Implant placement                        |           |      |         |      |
| 23  | Hard tissue augmentation                 |           |      |         |      |
| 24  | Soft tissue augmentation                 |           |      |         |      |
| 25  | pri-implants Diseases                    |           |      |         |      |
| 26  | osteotomy                                |           |      |         |      |
| 27  | Dental lasers                            |           |      |         |      |
| 28  | Skin and subcutaneous surgery            |           |      |         |      |
| 29  | Tumor surgery                            |           |      |         |      |
| 30  | Salivary gland surgery                   |           |      |         |      |
| 31  | Temporomandibular joint surgery          |           |      |         |      |
| 32  | Arch Bar                                 |           |      |         |      |
| 33  | Screws and plates                        |           |      |         |      |
| 34  | Mandibular fracture                      |           |      |         |      |
| 35  | Midfacial fracture                       |           |      |         |      |
| 36  | Upper facial fracture                    |           |      |         |      |
| 37  | Facial aesthetic surgery                 |           |      |         |      |
| 38  | Rhinoplasty                              |           |      |         |      |

|    |                                      |  |  |  |  |
|----|--------------------------------------|--|--|--|--|
| 39 | Bone grafting from inside the mouth  |  |  |  |  |
| 40 | Bone grafting from outside the mouth |  |  |  |  |
| 41 | Distraction osteogenesis             |  |  |  |  |
| 42 | Vascular microsurgery                |  |  |  |  |
| 43 | Cleft lip and palate                 |  |  |  |  |
| 44 | Hospital lessons                     |  |  |  |  |

Thank you

Assessing the extent to which the goals of teaching practical courses in the curriculum of post-graduate dental fields have been achieved from the perspective of participants in the National Board exam

Field of study: Removable and Fixed Prosthodontics

University of Education:..... Dental work experience:.....

Dear colleague, this questionnaire is designed to improve clinical skills training in specialized groups of dental schools in the country. We kindly ask you to actively participate in this important matter by answering accurately and choosing one of the options: poor, average, good, excellent, and completing other question options.

A) Overall assessment

| Row | Index                                       | Excellent | Good | Average | Poor |
|-----|---------------------------------------------|-----------|------|---------|------|
| 1   | Quality of basic science courses            |           |      |         |      |
| 2   | Quality of interdisciplinary courses        |           |      |         |      |
| 3   | Quality of the faculty members of the group |           |      |         |      |
| 4   | Number of faculty members in the group      |           |      |         |      |
| 5   | Quality of treated clinical cases           |           |      |         |      |
| 6   | Number of clinical cases treated            |           |      |         |      |
| 7   | Overall course evaluation                   |           |      |         |      |

- What specific skills do you need additional training in after graduation?

.....

.....

.....

Explanation:.....

b) How do you evaluate the impact of post-doctoral course training on acquiring the following clinical skills?

| Row | Skill                                     | Excellent | Good | Average | Poor |
|-----|-------------------------------------------|-----------|------|---------|------|
| 1   | Student education                         |           |      |         |      |
| 2   | Research Method                           |           |      |         |      |
| 3   | Professional ethics                       |           |      |         |      |
| 4   | Forensic Medicine Laws                    |           |      |         |      |
| 5   | Infection control                         |           |      |         |      |
| 6   | Clinical photography                      |           |      |         |      |
| 7   | Clinical pharmacology                     |           |      |         |      |
| 8   | Medical emergencies                       |           |      |         |      |
| 9   | Evaluating articles                       |           |      |         |      |
| 10  | Thesis                                    |           |      |         |      |
| 11  | Treatment plan                            |           |      |         |      |
| 12  | Intraoral radiography                     |           |      |         |      |
| 13  | Radiography of the salivary glands        |           |      |         |      |
| 14  | Radiography of the nasopharynx            |           |      |         |      |
| 15  | Radiograph of the temporomandibular joint |           |      |         |      |
| 16  | X-ray of the skull and face               |           |      |         |      |
| 17  | Panoramic radiography                     |           |      |         |      |
| 18  | Cephalometry                              |           |      |         |      |
| 19  | Computed tomography                       |           |      |         |      |
| 20  | Hospital lessons                          |           |      |         |      |

Thank you

Assessing the extent to which the goals of teaching practical courses in the curriculum of post-graduate dental fields have been achieved from the perspective of participants in the National Board exam

Field of study: Endodontics

University of Education:..... Dental work experience.....

Dear colleague, this questionnaire is designed to improve clinical skills training in specialized groups of dental schools in the country. We kindly ask you to actively participate in this important matter by answering accurately and choosing one of the options: poor, average, good, excellent, and completing other question options.

A) Overall assessment

| Row | Index                                       | Excellent | Good | Average | Poor |
|-----|---------------------------------------------|-----------|------|---------|------|
| 1   | Quality of basic science courses            |           |      |         |      |
| 2   | Quality of interdisciplinary courses        |           |      |         |      |
| 3   | Quality of the faculty members of the group |           |      |         |      |
| 4   | Number of faculty members in the group      |           |      |         |      |
| 5   | Quality of treated clinical cases           |           |      |         |      |
| 6   | Number of clinical cases treated            |           |      |         |      |
| 7   | Overall course evaluation                   |           |      |         |      |

- What specific skills do you need additional training in after graduation?

.....

.....

.....

Explanation.....



b) How do you evaluate the impact of post-doctoral course training on acquiring the following clinical skills?

| Row | Skill                                  | Excellent | Good | Average | Poor |
|-----|----------------------------------------|-----------|------|---------|------|
| 1   | Student education                      |           |      |         |      |
| 2   | Research Method                        |           |      |         |      |
| 3   | Professional ethics                    |           |      |         |      |
| 4   | Forensic Medicine Laws                 |           |      |         |      |
| 5   | Infection control                      |           |      |         |      |
| 6   | Clinical photography                   |           |      |         |      |
| 7   | Clinical pharmacology                  |           |      |         |      |
| 8   | Medical emergencies                    |           |      |         |      |
| 9   | Evaluating articles                    |           |      |         |      |
| 10  | Thesis                                 |           |      |         |      |
| 11  | Treatment plan                         |           |      |         |      |
| 12  | Preparing the access cavity            |           |      |         |      |
| 13  | Direct canal preparation               |           |      |         |      |
| 14  | Curved canal preparation               |           |      |         |      |
| 15  | Force eruption                         |           |      |         |      |
| 16  | Splint                                 |           |      |         |      |
| 17  | Root canal retreatment                 |           |      |         |      |
| 18  | Additional canal                       |           |      |         |      |
| 19  | Living pulp treatment                  |           |      |         |      |
| 20  | Pulp treatment with closed apex        |           |      |         |      |
| 21  | Apexogenesis                           |           |      |         |      |
| 22  | External root resorption               |           |      |         |      |
| 23  | Internal root resorption               |           |      |         |      |
| 24  | Trauma to the tooth                    |           |      |         |      |
| 25  | Calcified canal                        |           |      |         |      |
| 26  | Peri-radicular surgery                 |           |      |         |      |
| 27  | Microscope-assisted treatment          |           |      |         |      |
| 28  | Endo-perio lesions                     |           |      |         |      |
| 29  | Controlling incidents during treatment |           |      |         |      |
| 30  | Replantation                           |           |      |         |      |
| 31  | fresh socket Implant                   |           |      |         |      |

Thank you

Assessing the extent to which the goals of teaching practical courses in the curriculum of post-graduate dental fields have been achieved from the perspective of participants in the National Board exam

Field of study: Restorative dentistry

University of Education .....Dental work experience.....

Dear colleague, this questionnaire is designed to improve clinical skills training in specialized groups of dental schools in the country. We kindly ask you to actively participate in this important matter by answering accurately and choosing one of the options: poor, average, good ,excellent, and completing other question options..

A) Overall assessment:

| Row | Index                                       | Excellent | Good | Average | Poor |
|-----|---------------------------------------------|-----------|------|---------|------|
| 1   | Quality of basic science courses            |           |      |         |      |
| 2   | Quality of interdisciplinary courses        |           |      |         |      |
| 3   | Quality of the faculty members of the group |           |      |         |      |
| 4   | Number of faculty members in the group      |           |      |         |      |
| 5   | Quality of treated clinical cases           |           |      |         |      |
| 6   | Number of clinical cases treated            |           |      |         |      |
| 7   | Overall course evaluation                   |           |      |         |      |

- What specific skills do you need additional training in after graduation?

.....

.....

.....

Explanation .....

b) How do you evaluate the impact of post-doctoral course training on acquiring the following clinical skills?

| Row | Skill                                | Excellent | Good | Average | Poor |
|-----|--------------------------------------|-----------|------|---------|------|
| 1   | Student education                    |           |      |         |      |
| 2   | Research Method                      |           |      |         |      |
| 3   | Professional ethics                  |           |      |         |      |
| 4   | Forensic Medicine Laws               |           |      |         |      |
| 5   | Infection control                    |           |      |         |      |
| 6   | Clinical photography                 |           |      |         |      |
| 7   | Clinical pharmacology                |           |      |         |      |
| 8   | Medical emergencies                  |           |      |         |      |
| 9   | Evaluating articles                  |           |      |         |      |
| 10  | Thesis                               |           |      |         |      |
| 11  | Treatment plan                       |           |      |         |      |
| 12  | Dental materials                     |           |      |         |      |
| 13  | Classic amalgam restoration          |           |      |         |      |
| 14  | Extensive amalgam restoration        |           |      |         |      |
| 15  | Restoration with prefabricated post  |           |      |         |      |
| 16  | Restoration with an intra-dental pin |           |      |         |      |
| 17  | Metal casting Restorations           |           |      |         |      |
| 18  | Indirect composite restoration       |           |      |         |      |
| 19  | Advanced composite restoration       |           |      |         |      |

|    |                              |  |  |  |  |
|----|------------------------------|--|--|--|--|
| 20 | Restoration of damaged teeth |  |  |  |  |
| 21 | Aesthetic restoration        |  |  |  |  |
| 22 | Splint therapy               |  |  |  |  |
| 23 | Crown Restorations           |  |  |  |  |
| 24 | casting post fabrication     |  |  |  |  |
| 25 | Porcelain restorations       |  |  |  |  |
| 26 | Maryland Bridge              |  |  |  |  |
| 27 | Implant Crown                |  |  |  |  |
| 28 | Dental lasers                |  |  |  |  |

Thank you

Assessing the extent to which the goals of teaching practical courses in the curriculum of post-graduate dental fields have been achieved from the perspective of participants in the National Board exam

Field of study: Orthodontics

University of Education:..... Dental work experience:.....

Dear colleague, this questionnaire is designed to improve clinical skills training in specialized groups of dental schools in the country. We kindly ask you to actively participate in this important matter by answering accurately and choosing one of the options: poor, average, good, excellent, and completing other question options.

A) Overall assessment

| Row | Index                                       | Excellent | Good | Average | Poor |
|-----|---------------------------------------------|-----------|------|---------|------|
| 1   | Quality of basic science courses            |           |      |         |      |
| 2   | Quality of interdisciplinary courses        |           |      |         |      |
| 3   | Quality of the faculty members of the group |           |      |         |      |
| 4   | Number of faculty members in the group      |           |      |         |      |
| 5   | Quality of treated clinical cases           |           |      |         |      |
| 6   | Number of clinical cases treated            |           |      |         |      |
| 7   | Overall course evaluation                   |           |      |         |      |

- What specific skills do you need additional training in after graduation?

.....  
.....  
.....

Explanation:.....

b) How do you evaluate the impact of post-doctoral course training on acquiring the following clinical skills?

| Row | Skill                        | Excellent | Good | Average | Poor |
|-----|------------------------------|-----------|------|---------|------|
| 1   | Student education            |           |      |         |      |
| 2   | Research Method              |           |      |         |      |
| 3   | Professional ethics          |           |      |         |      |
| 4   | Forensic Medicine Laws       |           |      |         |      |
| 5   | Infection control            |           |      |         |      |
| 6   | Clinical photography         |           |      |         |      |
| 7   | Clinical pharmacology        |           |      |         |      |
| 8   | Medical emergencies          |           |      |         |      |
| 9   | Evaluating articles          |           |      |         |      |
| 10  | Thesis                       |           |      |         |      |
| 11  | Treatment plan               |           |      |         |      |
| 12  | Fabrication of devices       |           |      |         |      |
| 13  | Removable orthodontics       |           |      |         |      |
| 14  | Fixed orthodontics           |           |      |         |      |
| 15  | malocclusion class I         |           |      |         |      |
| 16  | Class I with severe crowding |           |      |         |      |
| 17  | Class II div 1               |           |      |         |      |
| 18  | Class II div 2               |           |      |         |      |
| 19  | Transverse dimation problems |           |      |         |      |
| 20  | Vertical dimation problems   |           |      |         |      |
| 21  | Orthosurgery                 |           |      |         |      |
| 22  | Impacted tooth               |           |      |         |      |
| 23  | Cleft palate                 |           |      |         |      |

Thank you

Assessing the extent to which the goals of teaching practical courses in the curriculum of post-graduate dental fields have been achieved from the perspective of participants in the National Board exam

Field of study: Pedodontics

University of Education:..... Dental work experience.....

Dear colleague, this questionnaire is designed to improve clinical skills training in specialized groups of dental schools in the country. We kindly ask you to actively participate in this important matter by answering accurately and choosing one of the options: poor, average, good, excellent, and completing other question options.

A) Overall assessment

| Row | Index                                       | Excellent | Good | Average | Poor |
|-----|---------------------------------------------|-----------|------|---------|------|
| 1   | Quality of basic science courses            |           |      |         |      |
| 2   | Quality of interdisciplinary courses        |           |      |         |      |
| 3   | Quality of the faculty members of the group |           |      |         |      |
| 4   | Number of faculty members in the group      |           |      |         |      |
| 5   | Quality of treated clinical cases           |           |      |         |      |
| 6   | Number of clinical cases treated            |           |      |         |      |
| 7   | Overall course evaluation                   |           |      |         |      |

- What specific skills do you need additional training in after graduation?

.....

.....

.....

Explanation.....

b) How do you evaluate the impact of post-doctoral course training on acquiring the following clinical skills?

| Row | Skill                                     | Excellent | Good | Average | Poor |
|-----|-------------------------------------------|-----------|------|---------|------|
| 1   | Student education                         |           |      |         |      |
| 2   | Research Method                           |           |      |         |      |
| 3   | Professional ethics                       |           |      |         |      |
| 4   | Forensic Medicine Laws                    |           |      |         |      |
| 5   | Infection control                         |           |      |         |      |
| 6   | Clinical photography                      |           |      |         |      |
| 7   | Clinical pharmacology                     |           |      |         |      |
| 8   | Medical emergencies                       |           |      |         |      |
| 9   | Evaluating articles                       |           |      |         |      |
| 10  | Thesis                                    |           |      |         |      |
| 11  | Treatment plan                            |           |      |         |      |
| 12  | Intraoral radiography                     |           |      |         |      |
| 13  | Radiography of the salivary glands        |           |      |         |      |
| 14  | Radiography of the nasopharynx            |           |      |         |      |
| 15  | Radiograph of the temporomandibular joint |           |      |         |      |
| 16  | X-ray of the skull and face               |           |      |         |      |
| 17  | Panoramic radiography                     |           |      |         |      |
| 18  | Cephalometry                              |           |      |         |      |
| 19  | Computed tomography                       |           |      |         |      |
| 20  | Hospital lessons                          |           |      |         |      |

Thank you
